# Supplementary material
Source: publisher site journal article supplement (https://www.dovepress.com/article/451042)
Supplement: Supplementary file 1 [file get_supplementary_file.php]

**Supporting Information**

**Acidic Environment-Responsive Metal Organic Framework-Mediated Dihydroartemisinin Delivery for Triggering Production of Reactive Oxygen Species in Drug-Resistant Lung Cancer**

Xiaojie Yan1,*, Xueying Zhao2,*, Mingde Fan3, Wenfu Zheng4,5, Guanxiong Zhu6, Bin Li1, Le Wang1

1Academician Workstation, Jiangxi University of Chinese Medicine, Nanchang, Jiangxi, People’s Republic of China; 2Department of Transfusion, The Second Hospital, Cheeloo College of Medicine, Shandong University, Jinan, Shandong, People’s Republic of China; 3Department of Neurosurgery, The Second Hospital, Cheeloo College of Medicine, Shandong University, Jinan, Shandong, People’s Republic of China; 4CAS Key Laboratory for Biological Effects of Nanomaterials and Nanosafety, National Center for NanoScience and Technology, Beijing, People’s Republic of China; 5School of Nanoscience and Engineering, University of Chinese Academy of Sciences, Beijing, People’s Republic of China; 6Department of Preventive Dentistry, Affiliated Stomatology Hospital of Guangzhou Medical University, Guangzhou, Guangdong, People’s Republic of China

*These authors contributed equally to this work

Correspondence: Le Wang; Bin Li, Academician Workstation, Jiangxi University of Chinese Medicine, Nanchang, Jiangxi, People’s Republic of China, Tel/Fax +86-791-86362367, Email wangle@jxutcm.edu.cn; [20010260@jxutcm.edu.cn](mailto:20010260@jxutcm.edu.cn)


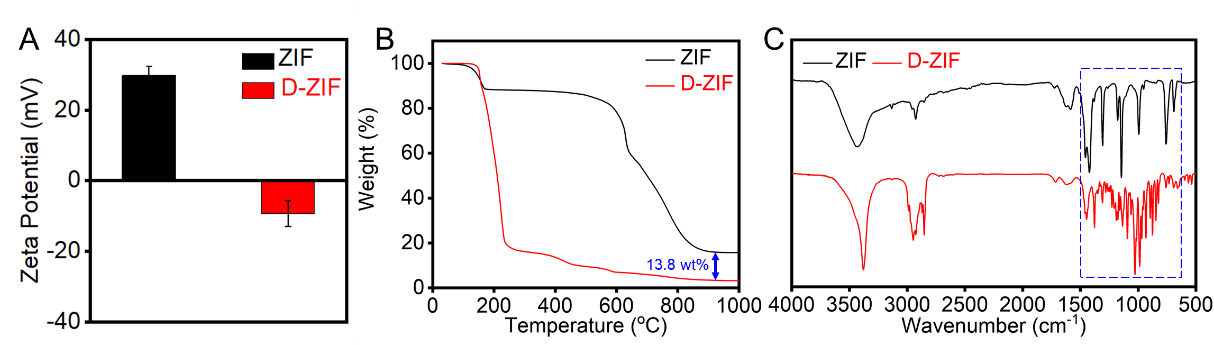


**Fig. S1**Characterization of ZIF and D-ZIF. (A) Zeta potential analysis of ZIF and D-ZIF. (B) TGA curves of ZIF and D-ZIF. (C) FT-IR spectra of ZIF and D-ZIF.


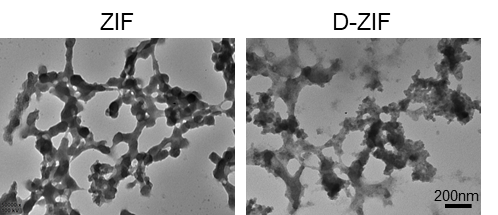


**Fig. S2** Morphology of ZIF and D-ZIF in response to pH 6.5. TEM images of ZIF and D-ZIF after 24 h. Scale bar: 200 nm.


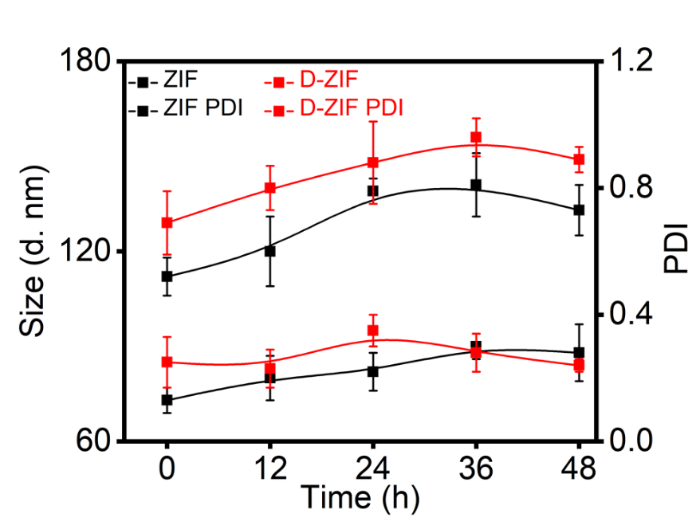


**Fig. S3** The stability of ZIF and D-ZIF.

**Fig. S4** The viability of sensitive A549 cells after incubation with different concentration of D-ZIF for 24 h. Statistical significance: ****p* < 0.001, and *****p* < 0.0001.


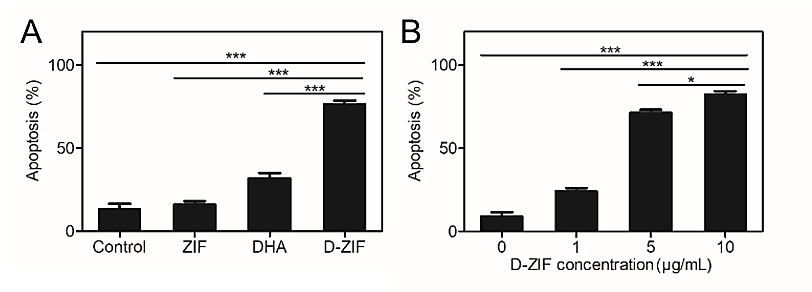


**Fig. S5** The biological processes induced by various formulations. (A)The percentage of apoptotic cells treated by different formulations. (B)The percentage of apoptotic cells treated by different concentrations of D-ZIF. Statistical significance: **p* < 0.05, and ****p* < 0.001.


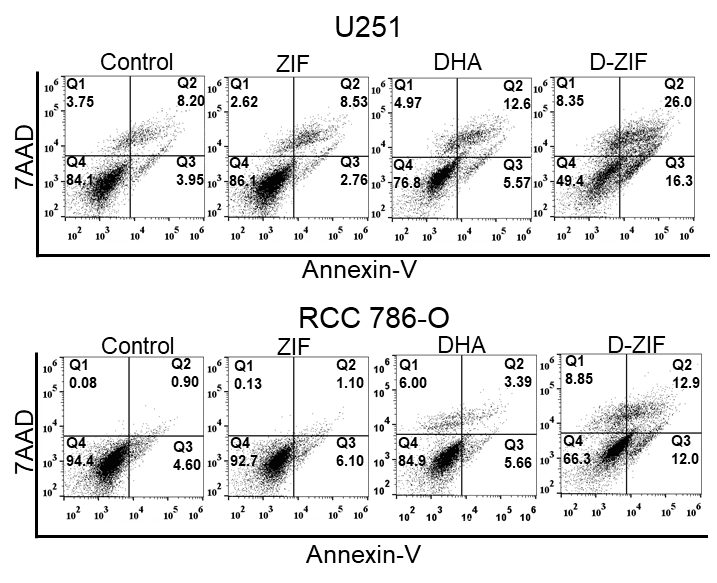


**Fig. S6** FCM analysis of U251 cells and RCC786-O cells treated with different formulations.


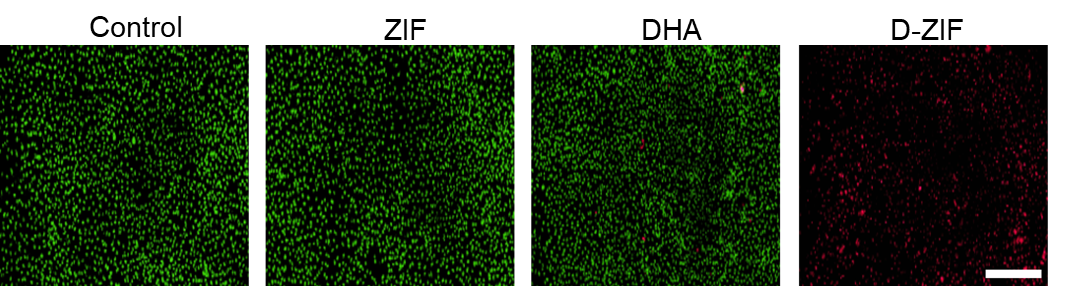


**Fig. S7** AO-EB dual staining of A549-TAX cells treated with different formulations for 12 h under 10×. Scale bar: 200 m.


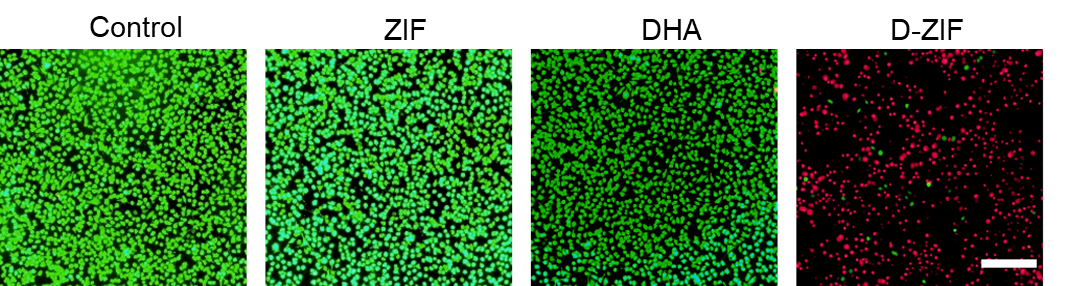
 **Fig. S8** Live/dead assay analysis of A549-TAX cells treated with different formulations for 12 h. Scale bar: 200 m.


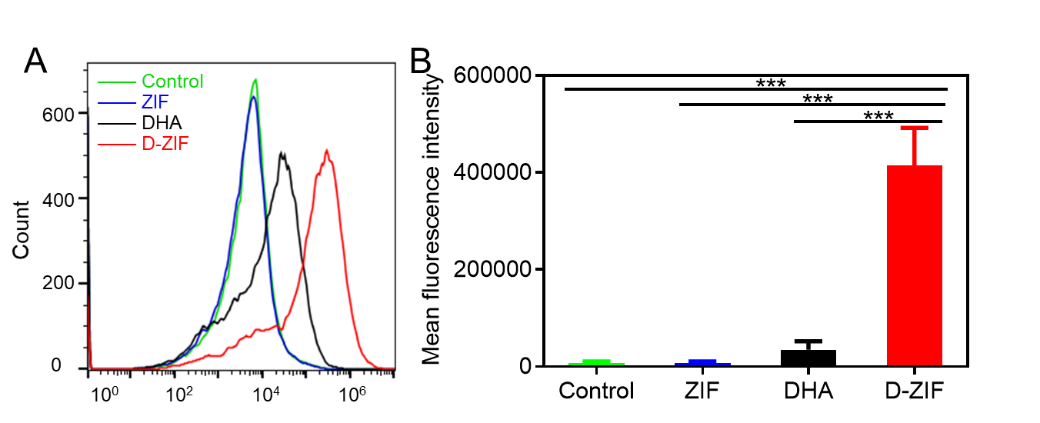


**Fig. S9** ROS levels in A549-TAX cells under the treatment of different formulations. (A) FCM analysis of ROS generation in A549-TAX cells treated with different formulations. (B) Mean fluorescence intensity ROS generation in A549-TAX cells treated with different formulations. Statistical significance: ****p* < 0.001.


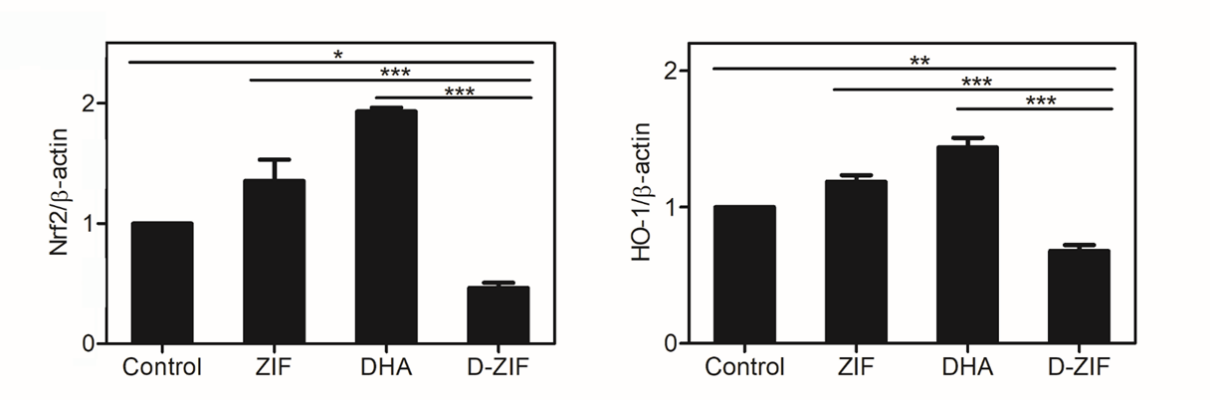


**Fig. S10** A549-TAX cells treated by different formulations to evaluate the expression of Nrf2/HO-1 pathway relative proteins. Statistical significance: **p* < 0.05, ***p* < 0.01, and ****p* < 0.001.


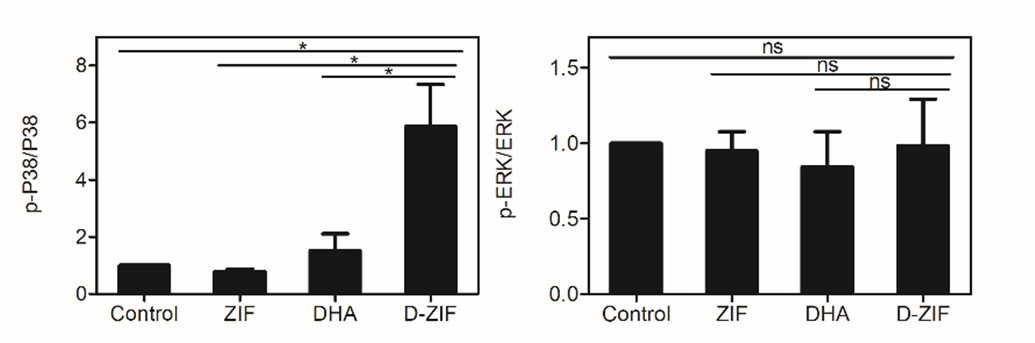


**Fig. S11** A549-TAX cells treated by different formulations to evaluate the expression of P38 MAPK pathway-related proteins. Statistical significance: **p* < 0.05, and ns: no significance.


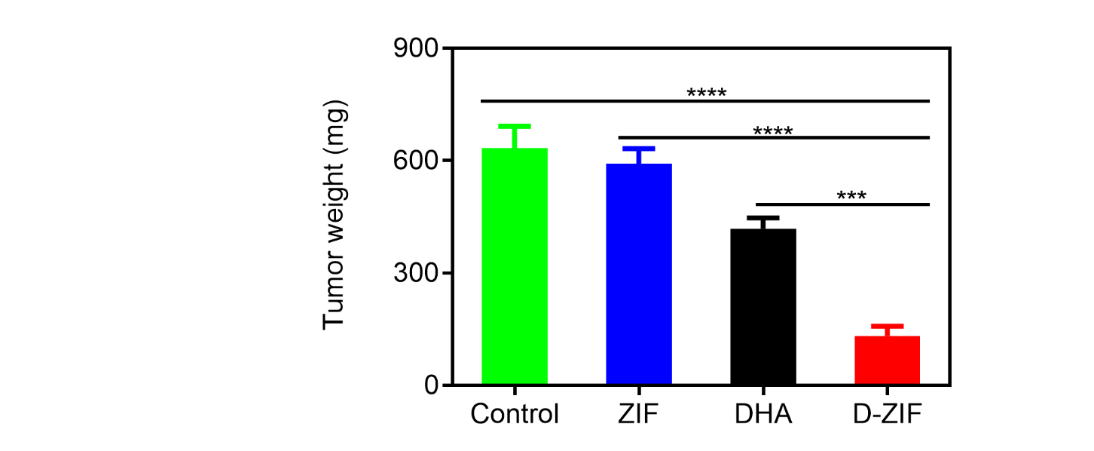


**Fig. S12** The weight of the excised tumors in different treatments. Statistical significance: ****p* < 0.001, and *****p* < 0.0001.


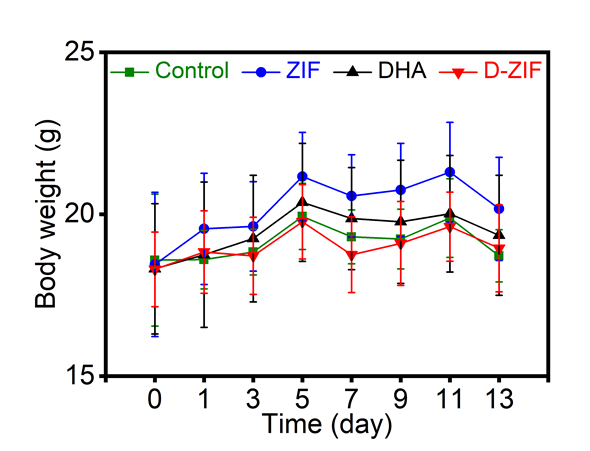


**Fig. S13** The changes of the mice body weight during different treatments.
